# Supplementary material for: Covered stents versus balloon angioplasty for failure of arteriovenous access: a systematic review and meta-analysis
Source: HighWire-hosted journal article supplement (doi:10.1136/bmjopen-2020-044356), 2021-06-01
Supplement: bmjopen-2020-044356supp001_data_supplement.pdf [file bmjopen-2020-044356supp001_data_supplement.pdf]

## Search Numbers

| Database                                                                                                                 | Interface                                       | Coverage                   | Date       | Hits:       | Comments                                                                     |
|--------------------------------------------------------------------------------------------------------------------------|-------------------------------------------------|----------------------------|------------|-------------|------------------------------------------------------------------------------|
| Cochrane Central Register of Controlled Trials                                                                           | Cochrane Library, Wiley                         | Issue 8 of 12, August 2020 | 25/08/2020 | 68          |                                                                              |
| Cochrane Database of Systematic                                                                                          | Cochrane Library, Wiley                         | Issue 8 of 12, August 2020 | 25/08/2020 | 2           |                                                                              |
| Database of Abstracts of Reviews of Effects                                                                              | Cochrane Library, Wiley                         | Issue 2 of 4, April 2015   | 24/05/2018 | 2           | No longer available or updated                                               |
| Embase                                                                                                                   | OvidSP                                          | 1974 to 2018 May 23        | 25/08/2020 | 980         |                                                                              |
| Ovid MEDLINE(R) Epub Ahead of Print, In-Process & Other Non-Indexed Citations, Ovid MEDLINE(R) Daily and Ovid MEDLINE(R) | OvidSP                                          | 1946-present               | 25/08/2020 | 555         |                                                                              |
| Science Citation Index & Conference Proceedings Citation Index - Science                                                 | Web of Science Core Collection, Thomson Reuters | 1945-present               | 25/08/2020 | 753         |                                                                              |
| <b>Total:</b>                                                                                                            |                                                 |                            |            | <b>2360</b> |                                                                              |
| Duplicates:                                                                                                              |                                                 |                            |            | 782         |                                                                              |
| <b>Final total:</b>                                                                                                      |                                                 |                            |            | <b>1578</b> |                                                                              |
| Results unique to this update                                                                                            |                                                 |                            |            | 189         | Breakdown = 113 articles, 60 conference abstracts and 16 trial registrations |
| <b>Trial registers:</b>                                                                                                  |                                                 |                            |            |             |                                                                              |

|                    |                                                                                                         |                                                                                                                                                      |            |    |                                                                                                                          |
|--------------------|---------------------------------------------------------------------------------------------------------|------------------------------------------------------------------------------------------------------------------------------------------------------|------------|----|--------------------------------------------------------------------------------------------------------------------------|
| ClinicalTrials.gov | <a href="https://clinicaltrials.gov/">https://clinicaltrials.gov/</a>                                   | (dialysis OR hemodialysis OR haemodialysis) AND (stent OR stents)                                                                                    | 25/08/2020 | 82 | There are 23 new trial registrations included in this update, see appropriate tab                                        |
| WHO ICTRP          | <a href="http://apps.who.int/trialsearch/default.aspx">http://apps.who.int/trialsearch/default.aspx</a> | dialysis AND stent OR hemodialysis AND stent OR haemodialysis AND stent OR dialysisAND stents OR hemodialysis AND stents OR haemodialysis AND stents | 24/05/2018 | 12 | This is not currently available due to difficulties accessing the database due to COVID related traffic on WHO web-site. |

**Medline**

| # ▲ | Searches                                                                                                              | Results |
|-----|-----------------------------------------------------------------------------------------------------------------------|---------|
| 1   | exp Renal Dialysis/                                                                                                   | 113844  |
| 2   | (haemodialysis or hemodialysis).ti,ab.                                                                                | 76552   |
| 3   | ((kidney or renal) adj dialysis).ti,ab.                                                                               | 1364    |
| 4   | (dialysis adj3 (access or patency)).ti,ab.                                                                            | 1995    |
| 5   | dialysis.ti.                                                                                                          | 39528   |
| 6   | (Arteriovenous Fistula/ or Arteriovenous Shunt, Surgical/) and Kidney Failure, Chronic/                               | 2572    |
| 7   | (Graft Occlusion, Vascular/ or Blood Vessel Prosthesis Implantation/) and Kidney Failure, Chronic/                    | 686     |
| 8   | 1 or 2 or 3 or 4 or 5 or 6 or 7                                                                                       | 140268  |
| 9   | *Stents/                                                                                                              | 44061   |
| 10  | Stents/ and Polytetrafluoroethylene/                                                                                  | 860     |
| 11  | ((ptfe or polytetrafluoroethylene or polytef or politef or teflon) and stent*).ti,ab.                                 | 1183    |
| 12  | ((covered or synthetic* or expanding or self-expanding) adj5 stent*).ti,ab.                                           | 8188    |
| 13  | ((flare or flair or viabahn or aspire or fluency or advanta) and (stent* or endoproshe* or prosthe* or graft*).ti,ab. | 719     |
| 14  | (flare or flair or viabahn or aspire or fluency or advanta).ti.                                                       | 4923    |
| 15  | 9 or 10 or 11 or 12 or 13 or 14                                                                                       | 53047   |
| 16  | 8 and 15                                                                                                              | 564     |
| 17  | exp animals/ not humans.sh.                                                                                           | 5E+06   |
| 18  | 16 not 17                                                                                                             | 555     |

**Embase**

| # ▲ | Searches                                                                                                              | Results |
|-----|-----------------------------------------------------------------------------------------------------------------------|---------|
| 1   | exp renal replacement therapy/                                                                                        | 188966  |
| 2   | (haemodialysis or hemodialysis).ti,ab.                                                                                | 106339  |
| 3   | ((kidney or renal) adj dialysis).ti,ab.                                                                               | 1859    |
| 4   | (dialysis adj3 (access or patency)).ti,ab.                                                                            | 3115    |
| 5   | dialysis.ti.                                                                                                          | 48927   |
| 6   | 1 or 2 or 3 or 4 or 5                                                                                                 | 219009  |
| 7   | *Stent/ or *vascular stent/ or *arterial stent/                                                                       | 33734   |
| 8   | (Stent/ or vascular stent/ or arterial stent/) and politef/                                                           | 1357    |
| 9   | ((ptfe or polytetrafluoroethylene or polytef or politef or teflon) and stent*).ti,ab.                                 | 1741    |
| 10  | ((covered or synthetic* or expanding or self-expanding) adj5 stent*).ti,ab.                                           | 14280   |
| 11  | ((flare or flair or viabahn or aspire or fluency or advanta) and (stent* or endoprosthe* or prosth* or graft*).ti,ab. | 1470    |
| 12  | (flare or flair or viabahn or aspire or fluency or advanta).ti.                                                       | 6753    |
| 13  | 7 or 8 or 9 or 10 or 11 or 12                                                                                         | 51731   |
| 14  | 6 and 13                                                                                                              | 861     |
| 15  | (exp animals/ or nonhuman/) not human/                                                                                | 6565136 |
| 16  | 14 not 15                                                                                                             | 850     |

**Cochrane**

| <b>ID</b> | <b>Search</b>                                                                                                                                                  |
|-----------|----------------------------------------------------------------------------------------------------------------------------------------------------------------|
| #1        | MeSH descriptor: [Renal Dialysis] explode all trees                                                                                                            |
| #2        | haemodialysis or hemodialysis or "kidney dialysis" or "renal dialysis":ti,ab,kw (Word variations have been searched)                                           |
| #3        | dialysis near/3 (access or patency):ti,ab,kw (Word variations have been searched)                                                                              |
| #4        | dialysis:ti (Word variations have been searched)                                                                                                               |
| #5        | #1 or #2 or #3 or #4                                                                                                                                           |
| #6        | MeSH descriptor: [Stents] this term only                                                                                                                       |
| #7        | ((ptfe or polytetrafluoroethylene or polytef or politef or teflon) and stent*):ti,ab,kw (Word variations have been searched)                                   |
| #8        | ((covered or synthetic* or expanding or self-expanding) near stent*):ti,ab,kw (Word variations have been searched)                                             |
| #9        | ((flare or flair or viabahn or aspire or fluency or advanta) and (stent* or endoprosthe* or prosthe* or graft*)):ti,ab,kw (Word variations have been searched) |
| #10       | (flare or flair or viabahn or aspire or fluency or advanta):ti (Word variations have been searched)                                                            |
| #11       | #6 or #7 or #8 or #9 or #10                                                                                                                                    |
| #12       | #5 and #11                                                                                                                                                     |

**Web of Knowledge (WoK)**

| <b>Set</b> | <b>Results</b> | <b>Save search history and/or create an alertOpen a saved search history</b>                                                                                                                                                                                                                                                                                               |
|------------|----------------|----------------------------------------------------------------------------------------------------------------------------------------------------------------------------------------------------------------------------------------------------------------------------------------------------------------------------------------------------------------------------|
| # 3        | 753            | #2 AND #1                                                                                                                                                                                                                                                                                                                                                                  |
| # 2        | 79,107         | TI=(stent*) OR TS=(((ptfe or polytetrafluoroethylene or polytef or politef or teflon) and stent*)) OR TS=(((covered or synthetic* or expanding or self-expanding) near stent*)) OR TS=(((flare or flair or viabahn or aspire or fluency or advanta) and (stent* or endoprosthe* or prosth* or graft*))) AND TI=(flare or flair or viabahn or aspire or fluency or advanta) |
| # 1        | 128,971        | TS=(haemodialysis or hemodialysis or "kidney dialysis" or "renal dialysis") OR TS=(dialysis near/3 (access or patency)) OR TI=(dialysis)                                                                                                                                                                                                                                   |

**Clinicaltrial.gov**

| <b>NCT Number</b> | <b>Title</b>                                                                                                                                                                                                 | <b>URL</b>                                                                                            |
|-------------------|--------------------------------------------------------------------------------------------------------------------------------------------------------------------------------------------------------------|-------------------------------------------------------------------------------------------------------|
| NCT03545113       | Graft-first Versus Fistula-first in Older Patients With End-stage Kidney Disease                                                                                                                             | <a href="https://ClinicalTrials.gov/show/NCT03545113">https://ClinicalTrials.gov/show/NCT03545113</a> |
| NCT03567408       | Clinical Study of Bivalirudin for Percutaneous Coronary Intervention (PCI)                                                                                                                                   | <a href="https://ClinicalTrials.gov/show/NCT03567408">https://ClinicalTrials.gov/show/NCT03567408</a> |
| NCT03575039       | VitaFlow™ II Transcatheter Aortic Valve System Study                                                                                                                                                         | <a href="https://ClinicalTrials.gov/show/NCT03575039">https://ClinicalTrials.gov/show/NCT03575039</a> |
| NCT03644017       | The Merit WRAPSODY, Ñ Endovascular Stent Graft                                                                                                                                                               | <a href="https://ClinicalTrials.gov/show/NCT03644017">https://ClinicalTrials.gov/show/NCT03644017</a> |
| NCT03666208       | Sirolimus Coated Angioplasty Balloon in the Salvage of Thrombosed Arteriovenous Graft                                                                                                                        | <a href="https://ClinicalTrials.gov/show/NCT03666208">https://ClinicalTrials.gov/show/NCT03666208</a> |
| NCT03671603       | Post-Marketing Safety Study in ST-Segment Elevation Myocardial Infarction (STEMI) Participants Undergoing Primary Percutaneous Coronary Intervention (PCI) Procedure With VISIPAQUE-Æ as the Contrast Medium | <a href="https://ClinicalTrials.gov/show/NCT03671603">https://ClinicalTrials.gov/show/NCT03671603</a> |
| NCT03728985       | Evaluation of the GORE-Æ EXCLUDER-Æ Thoracoabdominal Branch Endoprosthesis in the Treatment of Thoracoabdominal and Pararenal Aortic Aneurysms                                                               | <a href="https://ClinicalTrials.gov/show/NCT03728985">https://ClinicalTrials.gov/show/NCT03728985</a> |
| NCT03734679       | Safety and Efficacy of the SurVeil, Ñ Drug-Coated Balloon (AVess FIH)                                                                                                                                        | <a href="https://ClinicalTrials.gov/show/NCT03734679">https://ClinicalTrials.gov/show/NCT03734679</a> |
| NCT03891693       | Biomimetic Stent and Drug Eluting Balloon to Treat Recurrent Cephalic Arch Stenosis                                                                                                                          | <a href="https://ClinicalTrials.gov/show/NCT03891693">https://ClinicalTrials.gov/show/NCT03891693</a> |
| NCT03952780       | Korean Registry of Percutaneous EVAR With INCRAFT Stent Graft for the Treatment of Abdominal aortic Aneurysm (K-INCRAFT)                                                                                     | <a href="https://ClinicalTrials.gov/show/NCT03952780">https://ClinicalTrials.gov/show/NCT03952780</a> |
| NCT03969225       | Vascular Access Outcome Measure for Function: a validation Study In haemoDialysis                                                                                                                            |                                                                                                       |
| NCT04001504       | Vaccination Against Influenza to Prevent Cardiovascular Events After Acute Coronary Syndromes                                                                                                                | <a href="https://ClinicalTrials.gov/show/NCT04001504">https://ClinicalTrials.gov/show/NCT04001504</a> |

|             |                                                                                                                                     |                                                                                                       |
|-------------|-------------------------------------------------------------------------------------------------------------------------------------|-------------------------------------------------------------------------------------------------------|
| NCT04010123 | Post-Market Clinical Follow Up of Rotarex-ÆS Catheter                                                                               | <a href="https://ClinicalTrials.gov/show/NCT04010123">https://ClinicalTrials.gov/show/NCT04010123</a> |
| NCT04058691 | Prospective/Retrospective Registry of the E-vita OPEN PLUS Stent Graft System in France                                             | <a href="https://ClinicalTrials.gov/show/NCT04058691">https://ClinicalTrials.gov/show/NCT04058691</a> |
| NCT04220177 | Safety and Efficacy of the SETA LATECBA Stent Graft for EVAR in Subjects With AAA                                                   | <a href="https://ClinicalTrials.gov/show/NCT04220177">https://ClinicalTrials.gov/show/NCT04220177</a> |
| NCT04246463 | Terumo Aortic Global Endovascular Registry                                                                                          | <a href="https://ClinicalTrials.gov/show/NCT04246463">https://ClinicalTrials.gov/show/NCT04246463</a> |
| NCT04261686 | Post Approval Study of the BARD-Æ COVERA,Ñç Arteriovenous (AV) Stent Graft                                                          | <a href="https://ClinicalTrials.gov/show/NCT04261686">https://ClinicalTrials.gov/show/NCT04261686</a> |
| NCT04378361 | A Study in Patients With Complicated Type B Aortic Dissection Treated With the E-nya Thoracic Stent Graft                           | <a href="https://ClinicalTrials.gov/show/NCT04378361">https://ClinicalTrials.gov/show/NCT04378361</a> |
| NCT04381507 | A Study in Patients With a Descending TAA or PAU Treated With the E-nya Thoracic Stent Graft System                                 | <a href="https://ClinicalTrials.gov/show/NCT04381507">https://ClinicalTrials.gov/show/NCT04381507</a> |
| NCT04381754 | Use of Implanting the Biotronik Passeo-18 Lux Drug Coated Balloon to Treat Failing Haemodialysis Arteriovenous Fistulas and Grafts. | <a href="https://ClinicalTrials.gov/show/NCT04381754">https://ClinicalTrials.gov/show/NCT04381754</a> |
| NCT04383145 | A Study in Patients With Thoracoabdominal Aortic Aneurysm Treated With the E-nside TAAA Multibranch Stent Graft System              | <a href="https://ClinicalTrials.gov/show/NCT04383145">https://ClinicalTrials.gov/show/NCT04383145</a> |
| NCT04409912 | Sirolimus Coated Angioplasty Versus Plain Balloon Angioplasty                                                                       | <a href="https://ClinicalTrials.gov/show/NCT04409912">https://ClinicalTrials.gov/show/NCT04409912</a> |
| NCT04429243 | GORE-Æ VIABAHN-Æ Endoprosthesis Post-Marketing Surveillance Study                                                                   | <a href="https://ClinicalTrials.gov/show/NCT04429243">https://ClinicalTrials.gov/show/NCT04429243</a> |
