# Supplementary material for: Covered stents versus balloon angioplasty for failure of arteriovenous access: a systematic review and meta-analysis
Source: HighWire-hosted journal article supplement (doi:10.1136/bmjopen-2020-044356), 2021-06-01
Supplement: bmjopen-2020-044356supp002_data_supplement.pdf [file bmjopen-2020-044356supp002_data_supplement.pdf]

| Source                    | Initial data         | Data collected at three months |                   |                                | Data collected at six months    |                                     |                                | Data collected at 12 months      |                                     |                                  | Data collected at 24 months         |                   |                                |
|---------------------------|----------------------|--------------------------------|-------------------|--------------------------------|---------------------------------|-------------------------------------|--------------------------------|----------------------------------|-------------------------------------|----------------------------------|-------------------------------------|-------------------|--------------------------------|
|                           | Technical success    | Primary patency                | Secondary patency | Access circuit primary patency | Primary patency                 | Secondary patency                   | Access circuit primary patency | Primary patency                  | Secondary patency                   | Access circuit primary patency   | Primary patency                     | Secondary patency | Access circuit primary patency |
| Haskal <i>et al.</i> 2010 | <b>Yes</b>           | <b>Yes</b>                     | <b>No</b>         | <b>No</b>                      | <b>Yes</b>                      | <b>No</b>                           | <b>Yes</b>                     | <b>No</b>                        | <b>No</b>                           | <b>No</b>                        | <b>No</b>                           | <b>No</b>         | <b>No</b>                      |
|                           | (anatomical success) | (patency of treatment area)    |                   |                                | (patency of treatment area)     |                                     |                                |                                  |                                     |                                  |                                     |                   |                                |
| Haskal <i>et al.</i> 2016 | <b>Yes</b>           | <b>No</b>                      | <b>No</b>         | <b>No</b>                      | <b>No</b>                       | <b>Yes</b>                          | <b>No</b>                      | <b>Yes</b>                       | <b>Yes</b>                          | <b>Yes</b>                       | <b>Yes</b>                          | <b>Yes</b>        | <b>Yes</b>                     |
|                           | (anatomical success) |                                |                   |                                |                                 | (post-procedural secondary patency) |                                | (treatment area primary patency) | (post-procedural secondary patency) | (treatment area primary patency) | (post-procedural secondary patency) |                   |                                |
| Vesely <i>et al.</i> 2016 | <b>Yes</b>           | <b>No</b>                      | <b>No</b>         | <b>No</b>                      | <b>Yes</b>                      | <b>No</b>                           | <b>Yes</b>                     | <b>Yes</b>                       | <b>No</b>                           | <b>Yes</b>                       | <b>Yes</b>                          | <b>No</b>         | <b>Yes</b>                     |
|                           | (anatomical success) |                                |                   |                                | (target lesion primary patency) |                                     |                                | (target lesion primary patency)  |                                     |                                  | (target lesion primary patency)     |                   |                                |
| Kavan <i>et al.</i> 2016  | <b>No</b>            | <b>No</b>                      | <b>No</b>         | <b>No</b>                      | <b>Yes</b>                      | <b>No</b>                           | <b>Yes</b>                     | <b>No</b>                        | <b>No</b>                           | <b>No</b>                        | <b>No</b>                           | <b>No</b>         | <b>No</b>                      |
|                           |                      |                                |                   |                                |                                 |                                     |                                |                                  |                                     |                                  |                                     |                   |                                |

|                          |            |                                     |           |            |                                     |           |            |                                     |            |            |                         |            |                 |
|--------------------------|------------|-------------------------------------|-----------|------------|-------------------------------------|-----------|------------|-------------------------------------|------------|------------|-------------------------|------------|-----------------|
| Yang <i>et al.</i> 2018  | <b>Yes</b> | <b>Yes</b>                          | <b>No</b> | <b>Yes</b> | <b>Yes</b>                          | <b>No</b> | <b>Yes</b> | <b>Yes</b>                          | <b>No</b>  | <b>Yes</b> | <b>No</b>               | <b>No</b>  | <b>No</b>       |
|                          |            | (post-intervention primary patency) |           |            | (post-intervention primary patency) |           |            | (post-intervention primary patency) |            |            |                         |            |                 |
| Kavan <i>et al.</i> 2019 | <b>Yes</b> | <b>No</b>                           | <b>No</b> | <b>No</b>  | <b>No</b>                           | <b>No</b> | <b>No</b>  | <b>Yes</b>                          | <b>Yes</b> | <b>Yes</b> | <b>Yes</b>              | <b>Yes</b> | <b>Yes</b>      |
|                          |            |                                     |           |            |                                     |           |            | (primary patency rates)             |            |            | (primary patency rates) |            |                 |
| Ave-NEW (on-going)       | <b>Yes</b> | <b>No</b>                           | <b>No</b> | <b>No</b>  | <b>Yes</b>                          | <b>No</b> | <b>Yes</b> | <b>Yes</b>                          | <b>No</b>  | <b>Yes</b> | <b>On-going</b>         | <b>No</b>  | <b>On-going</b> |

**Supplementary Table 1.** Summary of outcome data specifically stated at three, six, 12, and 24 months, otherwise estimated by Kaplan-Meier curves. Interchangeable definitions were cited in brackets if different from terminology in the heading.

| Source                    | Treatment      | Access characteristics  |                               |                        |                      |                      |            |                    |            | Target lesion/location of stenosis | Age of access (years) | Number of prior interventions |    |
|---------------------------|----------------|-------------------------|-------------------------------|------------------------|----------------------|----------------------|------------|--------------------|------------|------------------------------------|-----------------------|-------------------------------|----|
|                           |                | Arm with graft/fistulae | Location of access            | AV graft configuration | AV graft type        | Arterial anastomosis |            | Venous anastomosis |            |                                    |                       |                               |    |
| Haskal <i>et al.</i> 2010 | Angioplasty    | Left                    | Forearm: 24 (26.1%)           | Loop                   | Tapered: 10 (12.9%)  | Axillary             | 2 (2.2%)   | Axillary           | 30 (32.3%) | NR                                 | n=93                  | 2.2 ± 1.9                     | NR |
|                           |                | 71 (76.3%)              | Upper arm: 67 (72.8%)         | 37 (39.7%)             | Straight: 61 (79.2%) | Brachial             | 87 (93.5%) | Basilic            | 51 (54.8%) |                                    |                       |                               |    |
|                           |                | Right                   | Across elbow (jump): 1 (1.1%) | Straight               | Stepped: 5 (6.5%)    | Radial               | 4 (4.3%)   | Brachial           | 3 (3.2%)   |                                    |                       |                               |    |
|                           |                | 22 (23.7%)              | 56 (50.3%)                    | Other: 1 (1.3%)        | Ulnar                | 0                    | Cephalic   | 9 (9.7%)           |            |                                    |                       |                               |    |
|                           |                |                         |                               |                        | Other                | 0                    | Other      | 0                  |            |                                    |                       |                               |    |
|                           |                |                         |                               |                        |                      |                      |            |                    |            |                                    |                       |                               |    |
|                           | Covered stents | Left                    | Forearm: 20 (20.6%)           | Loop                   | Tapered: 14 (17.5%)  | Axillary             | 2 (2.1%)   | Axillary           | 22 (22.7%) | NR                                 | n=97                  | 2.7 ± 2.1                     | NR |
|                           |                | 74 (76.3%)              | Upper arm: 73 (75.3%)         | 42 (43.3%)             | Straight: 53 (66.3%) | Brachial             | 92 (94.8%) | Basilic            | 56 (57.7%) |                                    |                       |                               |    |
|                           |                | Right                   | Across elbow (jump): 2 (2.1%) | Straight               | Stepped: 8 (10%)     | Radial               | 1 (1.0%)   | Brachial           | 14 (14.4%) |                                    |                       |                               |    |
|                           |                | 23 (23.7%)              | 55 (56.7%)                    | Other: 5 (6.2%)        | Ulnar                | 0                    | Cephalic   | 3 (3.1%)           |            |                                    |                       |                               |    |
|                           |                |                         |                               |                        | Other                | 2 (2.1%)             | Other      | 2 (2.1%)           |            |                                    |                       |                               |    |
|                           |                |                         |                               |                        |                      |                      |            |                    |            |                                    |                       |                               |    |

|                           |                |                                                       |                                                                                                     |                                                          |     |                             |                               |                                                                                          |                        |                                                                                   |
|---------------------------|----------------|-------------------------------------------------------|-----------------------------------------------------------------------------------------------------|----------------------------------------------------------|-----|-----------------------------|-------------------------------|------------------------------------------------------------------------------------------|------------------------|-----------------------------------------------------------------------------------|
| Rajan <i>et al.</i> 2015  | Angioplasty    | Left<br>3 (60.0%)<br><br>Right<br>2 (40.0%)           | NR                                                                                                  | N/A                                                      | N/A | Brachial<br><br>5<br>(100%) | Cephalic<br><br>5<br>(100%)   | All cephalic arch stenoses<br><br>Junction<br>1 (20.0%)<br><br>Through arch<br>4 (80.0%) | NR                     | n=3 patients with previous BMS were treated w angioplasty alone<br><br>0.6 ± 0.55 |
|                           | Covered stents | Left<br>2 (22.2%)<br><br>Right<br>7 (77.8%)           | NR                                                                                                  | N/A                                                      | N/A | Brachial<br><br>9<br>(100%) | Cephalic<br><br>9<br>(100%)   | All cephalic arch stenoses<br><br>Junction<br>1 (11.1%)<br><br>Through arch<br>8 (88.9%) | NR                     | 0                                                                                 |
| Haskal <i>et al.</i> 2016 | Angioplasty    | Left<br><br>97 (73.5%)<br><br>Right<br><br>35 (26.5%) | Forearm:<br>14<br>(10.6%)<br><br>Across antecubital fossa<br><br>0<br><br>Upper arm: 118<br>(89.4%) | Loop<br><br>34 (25.8%)<br><br>Straight<br><br>98 (74.2%) | NR  | Axillary<br><br>5<br>(3.8%) | Axillary<br><br>57<br>(43.2%) | NR                                                                                       | n=132<br><br>1.7 ± 2.2 | n=132<br><br>1.6 ± 2.5                                                            |
|                           |                | Brachial<br><br>124<br>(93.9%)                        | Basilic<br><br>57<br>(43.2%)                                                                        |                                                          |     |                             |                               |                                                                                          |                        |                                                                                   |
|                           |                | Radial<br><br>2<br>(1.5%)                             | Brachial<br><br>14<br>(10.6%)                                                                       |                                                          |     |                             |                               |                                                                                          |                        |                                                                                   |
|                           |                | Ulnar<br><br>1<br>(0.8%)                              | Cephalic<br><br>4<br>(3.0%)                                                                         |                                                          |     |                             |                               |                                                                                          |                        |                                                                                   |
|                           |                | Other<br><br>0                                        | Other<br><br>0                                                                                      |                                                          |     |                             |                               |                                                                                          |                        |                                                                                   |

|                           |                |                     |                                                |                                                          |    |                         |                        |                                        |                          |                    |
|---------------------------|----------------|---------------------|------------------------------------------------|----------------------------------------------------------|----|-------------------------|------------------------|----------------------------------------|--------------------------|--------------------|
|                           | Covered stents | Left<br>99 (71.7%)  | Forearm: 13 (9.4%)<br>Across antecubital fossa | Loop<br>38 (27.7%)                                       | NR | Axillary<br>4 (2.9%)    | Axillary<br>62 (44.9%) | NR                                     | n=138<br>1.8 ± 2.1       | n=138<br>1.8 ± 2.1 |
|                           |                | Right<br>39 (28.3%) | Upper arm: 124 (89.9%)                         | Straight<br>99 (72.3%)                                   |    | Brachial<br>129 (93.5%) | Basilic<br>42 (30.4%)  |                                        |                          |                    |
|                           |                |                     |                                                |                                                          |    | Radial<br>4 (2.9%)      | Brachial<br>24 (17.4%) |                                        |                          |                    |
|                           |                |                     |                                                |                                                          |    | Ulnar<br>0              | Cephalic<br>7 (5.1%)   |                                        |                          |                    |
|                           |                |                     |                                                |                                                          |    | Other<br>1 (0.7%)       | Other<br>3 (2.2%)      |                                        |                          |                    |
| Vesely <i>et al.</i> 2016 | Angioplasty    | Left<br>104 (70.3%) | Forearm<br>49 (33.1%)                          | Loop<br>82 (55.4%)                                       | NR | NR                      | NR                     | Venous anastomosis of prosthetic graft | n=137 (EPP)<br>2.3 ± 2.7 | n=138<br>1.8 ± 2.3 |
|                           |                | Right<br>44 (29.7%) | Upper arm<br>99 (66.9%)                        | Straight<br>32 (21.6%)<br>Data not available: 34 (23.0%) |    |                         |                        |                                        |                          |                    |
|                           | Covered stents | Left<br>105 (72.4%) | Forearm<br>46 (31.7%)                          | Loop<br>83 (57.2%)                                       | NR | NR                      | NR                     | Venous anastomosis of prosthetic graft | n=130 (EPP)<br>2.0 ± 2.0 | n=131<br>1.9 ± 2.3 |
|                           |                | Right<br>40 (27.6%) | Upper arm<br>99 (68.3%)                        | Straight<br>27 (18.6%)<br>Data not available: 35 (24.2%) |    |                         |                        |                                        |                          |                    |

|                          |                |                              |                                                        |                               |          |    |             |             |               |    |                       |                           |
|--------------------------|----------------|------------------------------|--------------------------------------------------------|-------------------------------|----------|----|-------------|-------------|---------------|----|-----------------------|---------------------------|
| Kavan <i>et al.</i> 2016 | Angioplasty    | See Kavan <i>et al.</i> 2019 |                                                        |                               |          |    |             |             |               |    |                       | Overlapping study in 2019 |
|                          | Covered stents | See Kavan <i>et al.</i> 2019 |                                                        |                               |          |    |             |             |               |    |                       |                           |
| Yang <i>et al.</i> 2018  | Angioplasty    | NR                           | Upper arm<br>36<br>(73.5%)<br>Forearm<br>13<br>(26.5%) | Loop (all 6mm)<br>49 (50.0%)  | NR       | NR |             | Axillary    | 32<br>(65.3%) | NR | n=49<br><br>3.3 ± 2.6 | NR                        |
|                          |                |                              |                                                        |                               |          |    |             | Basilic     | 8<br>(16.3%)  |    |                       |                           |
|                          |                |                              |                                                        |                               |          |    |             | Brachial    | 4<br>(8.2%)   |    |                       |                           |
|                          |                |                              |                                                        |                               |          |    |             | Cephalic    | 3<br>(6.1%)   |    |                       |                           |
|                          |                |                              |                                                        |                               |          |    |             | Antecubital | 1<br>(2.0%)   |    |                       |                           |
|                          |                |                              |                                                        |                               |          |    |             | Subclavian  | 1<br>(2.0%)   |    |                       |                           |
|                          | Covered stents | NR                           | Upper arm<br>33<br>(67.3%)<br>Forearm<br>16<br>(32.7%) | Loop (all 6 mm)<br>49 (50.0%) | NR       | NR |             | Axillary    | 30<br>(61.2%) | NR | n=49<br><br>4.6 ± 8.5 | NR                        |
|                          |                |                              |                                                        |                               |          |    |             | Basilic     | 8<br>(16.3%)  |    |                       |                           |
|                          |                |                              |                                                        |                               |          |    |             | Brachial    | 3<br>(6.1%)   |    |                       |                           |
|                          |                |                              |                                                        |                               |          |    |             | Cephalic    | 6<br>(12.2%)  |    |                       |                           |
|                          |                |                              |                                                        |                               |          |    |             | Antecubital | 0             |    |                       |                           |
|                          |                |                              |                                                        |                               |          |    |             | Subclavian  | 2<br>(4.1%)   |    |                       |                           |
| Angioplasty              |                |                              | Loop                                                   |                               | Brachial | 16 | Superficial | 13          | Venous arm    |    |                       |                           |

|                          |                |    |    |                                             |     |        |              |          |                |                                                                       |                                                                       |                |
|--------------------------|----------------|----|----|---------------------------------------------|-----|--------|--------------|----------|----------------|-----------------------------------------------------------------------|-----------------------------------------------------------------------|----------------|
| Kavan <i>et al.</i> 2019 |                | NR | NR | 12 (60.0%)<br>Straight<br>8 (40.0%)         | NR  |        | (80.0%)      |          | (65.0%)        | 11 (55.0%)<br>Anastomosis<br>9 (45.0%)                                | 3.1<br>(IQR 3.8)                                                      | NR             |
|                          | Covered stents | NR | NR | Loop<br>15 (75.0%)<br>Straight<br>5 (25.0%) | NR  | Radial | 4<br>(20.0%) | Deep     | 7<br>(35.0%)   | 16<br>(80.0%)<br>Superficial<br>4<br>(20.0%)                          | 16<br>(80.0%)<br>Venous arm<br>4 (20.0%)<br>Anastomosis<br>16 (80.0%) | 4<br>(IQR 3.0) |
| AveNEW<br>(ongoing)      | Angioplasty    | NR | NR | N/A                                         | N/A | NR     | NR           | Cephalic | 95<br>(68.8%)  | Cephalic arch<br>70 (50.7%)<br>Cephalic vein<br>outflow 24<br>(17.4%) | NR                                                                    | NR             |
|                          | Covered stents | NR | NR | N/A                                         | N/A | NR     | NR           | Basilic  | 42<br>(30.4%)  | Basilic vein<br>swing point<br>and outflow 33<br>(23.9%)              | NR                                                                    | NR             |
|                          |                |    |    |                                             |     |        |              | Cephalic | 105<br>(73.9%) | Cephalic arch<br>78 (54.9%)<br>Cephalic vein<br>outflow 25<br>(17.6%) | NR                                                                    | NR             |
|                          |                |    |    |                                             |     |        |              | Basilic  | 35<br>(24.6%)  | Basilic vein<br>swing point<br>and outflow 29<br>(20.4%)              |                                                                       |                |

**Supplementary table 2.** Summary of arteriovenous access characteristics in included studies.

Abbreviations: AV: arteriovenous; NR: not recorded; EPP = effectiveness per protocol.



| Source                    | Treatment | COMPLICATIONS |         |         |           |           |            |              |            |      |              |                         |                 |         |                 |                                    |             |                |         |       | Author comments                                                                           |
|---------------------------|-----------|---------------|---------|---------|-----------|-----------|------------|--------------|------------|------|--------------|-------------------------|-----------------|---------|-----------------|------------------------------------|-------------|----------------|---------|-------|-------------------------------------------------------------------------------------------|
|                           |           | CVA           | CCF     | Kinking | Migration | Emb-olism | Haema-toma | Haem-orrhage | Infec-tion | Pain | Perfora-tion | Perman-ent deform-ation | Pseudo-aneurysm | Oe-dema | Steal synd-rome | Stenosis requiring re-intervention | Thrombos-is | Vessel rupture | Death   | Other |                                                                                           |
| Haskal <i>et al.</i> 2010 | Angio     | 3<br>3%       | 2<br>2% | N/A     | N/A       | 0         | 0          | 2<br>2%      | 2<br>2%    | NR   | NR           | N/A                     | 2<br>2%         | 2<br>2% | 1<br>1%         | 69<br>77%                          | 19<br>21%   | 1<br>1%        | 5<br>6% | 0     |                                                                                           |
|                           | Stents    | 2<br>2%       | 4<br>4% | 0       | 4<br>4%   | 0         | 2<br>2%    | 6<br>6%      | 6<br>6%    | NR   | NR           | 1<br>1%                 | 5<br>5%         | 3<br>3% | 2<br>2%         | 38<br>40%                          | 31<br>33%   | 3<br>3%        | 5<br>5% | 0     |                                                                                           |
| Rajan <i>et al.</i> 2015  | Angio     | 0             | 0       | 0       | 0         | 0         | 0          | 0            | 0          | 0    | 0            | 0                       | 0               | 0       | 0               | 0                                  | 0           | 0              | 0       | 0     | No complications or adverse events were observed for angioplasty or stent-graft placement |
|                           | Stents    | 0             | 0       | 0       | 0         | 0         | 0          | 0            | 0          | 0    | 0            | 0                       | 0               | 0       | 0               | 0                                  | 0           | 0              | 0       | 0     |                                                                                           |

|                                 |        |                                                         |            |          |                   |           |            |             |              |             |           |          |              |            |            |               |              |            |    |                                                                  |                                                                                                                                                                                                                                           |
|---------------------------------|--------|---------------------------------------------------------|------------|----------|-------------------|-----------|------------|-------------|--------------|-------------|-----------|----------|--------------|------------|------------|---------------|--------------|------------|----|------------------------------------------------------------------|-------------------------------------------------------------------------------------------------------------------------------------------------------------------------------------------------------------------------------------------|
| Haskal<br><i>et al.</i><br>2016 | Angio  | 6<br>4.50%                                              | 6<br>4.50% | 0<br>N/A | N/A<br>1<br>0.8%* | 0         | 1<br>0.80% | 10<br>7.60% | 42<br>31.80% | 6<br>4.50%  | 0         | 0<br>N/A | 16<br>12.10% | 3<br>2.30% | 3<br>2.30% | 109<br>82.60% | 48<br>36.40% | 2<br>1.50% | NR | 83<br>62.90%                                                     | There was no significant difference between the percentage of patients with at least 1 adverse events: 94.2% (130 of 138) for the SG group and 97.0% (128 of 132) for the PTA group (p = 0.378).<br><br>No deaths were related to device. |
|                                 | Stents | 2<br>1.40%                                              | 9<br>6.50% | 0        | 1<br>0.70%        | 1<br>0.7% | 5<br>3.60% | 10<br>7.2%  | 40<br>29%    | 14<br>10.1% | 1<br>0.7% | 0        | 9<br>6.5%    | 3<br>2.20% | 6<br>4.30% | 87<br>63%     | 60<br>43.50% | 2<br>1.4%  | NR | 82<br>59.40%                                                     |                                                                                                                                                                                                                                           |
| Vesely<br><i>et al.</i><br>2016 | Angio  | NR<br>(26)<br>2<br>minor,<br>2<br>major<br>22<br>deaths |            |          |                   |           | 1          |             |              |             |           |          |              |            |            |               |              |            | 22 | 1<br>Infilt-<br>ration<br>leading<br>to graft<br>abando<br>nment | There were no differences in the proportion of patients who experienced any device, procedure,                                                                                                                                            |

|                          |        |                                           |  |  |  |  |  |  |  |  |  |  |  |  |  |  |  |  |  |    |                                                                                                                                                                                                                                                                                                                   |
|--------------------------|--------|-------------------------------------------|--|--|--|--|--|--|--|--|--|--|--|--|--|--|--|--|--|----|-------------------------------------------------------------------------------------------------------------------------------------------------------------------------------------------------------------------------------------------------------------------------------------------------------------------|
|                          | Stents | NR<br>(27)<br>4<br>minor,<br>23<br>deaths |  |  |  |  |  |  |  |  |  |  |  |  |  |  |  |  |  | 23 | and treatment site-related adverse event, either major or minor, between the two treatment groups (P ¼ .98). There were no major procedure-related or stent graft-related adverse events in patients treated with a Viabahn stent graft during the 24-month study period.<br><br>No deaths were related to device |
| Kavan <i>et al.</i> 2016 | Angio  | NR                                        |  |  |  |  |  |  |  |  |  |  |  |  |  |  |  |  |  |    | Not stated and study was in Czech                                                                                                                                                                                                                                                                                 |
|                          | Stents | NR                                        |  |  |  |  |  |  |  |  |  |  |  |  |  |  |  |  |  |    |                                                                                                                                                                                                                                                                                                                   |
| Yang <i>et al.</i> 2018  | Angio  | NR                                        |  |  |  |  |  |  |  |  |  |  |  |  |  |  |  |  |  |    | Neither the study group nor the control group had any major intraoperative complications requiring surgical or medical                                                                                                                                                                                            |

|                                |        |         |                                                                                                                    |
|--------------------------------|--------|---------|--------------------------------------------------------------------------------------------------------------------|
|                                | Stents | NR      | treatment, and no procedure-related adverse events were observed during the outpatient clinic follow-up (6 months) |
| Kavan<br><i>et al.</i><br>2019 | Angio  | NR      | Not stated                                                                                                         |
|                                | Stents | NR      |                                                                                                                    |
| Ave-<br>NEW<br>(on-<br>going)  | Angio  | Ongoing | Trial is ongoing                                                                                                   |
|                                | Stents | Ongoing |                                                                                                                    |

**Supplementary table 3.** Summary of complications in included studies. Blank cells and NR indicate no records. Abbreviations: CVA: cerebrovascular accident; CCF: congestive cardiac failure.

| Source                                             | Treatment      | Time                          | Method used to measure patency at follow-up | Comments                                                                                                                                                                                                             |
|----------------------------------------------------|----------------|-------------------------------|---------------------------------------------|----------------------------------------------------------------------------------------------------------------------------------------------------------------------------------------------------------------------|
| Haskal <i>et al.</i> 2010<br>(FLAIR pivotal trial) | Angioplasty    | Baseline                      | Angiography                                 | Mandatory clinical review and angiography w<br>core lab quantitative review at 2 and 6 m                                                                                                                             |
|                                                    |                | 2m                            | Angiography                                 |                                                                                                                                                                                                                      |
|                                                    |                | 6m                            | Angiography                                 |                                                                                                                                                                                                                      |
|                                                    | Covered stents | Baseline                      | Angiography                                 |                                                                                                                                                                                                                      |
| 2m                                                 |                | Angiography                   |                                             |                                                                                                                                                                                                                      |
| 6m                                                 |                | Angiography                   |                                             |                                                                                                                                                                                                                      |
| Rajan <i>et al.</i> 2015                           | Angioplasty    | Baseline                      | Angiography                                 | Clinical evaluation for evidence of access<br>dysfunction according to Kidney Disease<br>Outcomes<br>Quality Initiative criteria or angiographic<br>follow-up as per institutional protocol at 3-<br>month intervals |
|                                                    |                | 3m                            | Ultrasound and/or angiography               |                                                                                                                                                                                                                      |
|                                                    |                | 6m                            | Ultrasound and/or angiography               |                                                                                                                                                                                                                      |
|                                                    | 1y             | Ultrasound and/or angiography |                                             |                                                                                                                                                                                                                      |
| Covered stents                                     | Covered stents | Baseline                      | Angiography                                 | Ultrasound initially unless meet certain<br>criteria then proceed with angiography                                                                                                                                   |
|                                                    |                | 3m                            | Ultrasound and/or angiography               |                                                                                                                                                                                                                      |
|                                                    |                | 6m                            | Ultrasound and/or angiography               |                                                                                                                                                                                                                      |
|                                                    |                | 1y                            | Ultrasound and/or angiography               |                                                                                                                                                                                                                      |

|                                             |                |                                                         |                                                                         |                                                                                                                                                                                                                    |
|---------------------------------------------|----------------|---------------------------------------------------------|-------------------------------------------------------------------------|--------------------------------------------------------------------------------------------------------------------------------------------------------------------------------------------------------------------|
| Haskal <i>et al.</i> 2016<br>(RENOVA trial) | Angioplasty    | Baseline<br>1m (30 days)<br>6m<br>1y<br>2y              | Angiography<br>*<br>*<br>*<br>*                                         | Patency numbers in both groups were higher than in the Flair pivotal trial because there was no mandatory angiographic follow-up*, and therefore, there was no loss of patency due to angiographic findings alone. |
|                                             | Covered stents | Baseline<br>1m (30 days)<br>6m<br>1y<br>2y              | Angiography<br>*<br>*<br>*<br>*                                         |                                                                                                                                                                                                                    |
| Vesely <i>et al.</i> 2016<br>(REVISE trial) | Angioplasty    | Baseline<br>1m (30 days)<br>3m<br>6m<br>1y<br>18m<br>2y | Angiography<br>**<br>**<br>**<br>**<br>**<br>**                         | Management of each patient's haemodialysis graft was determined by the patient's nephrologist and local protocols at the haemodialysis treatment centre**. Follow up in 1, 3, 6, 12, 18, and 24 months             |
|                                             | Covered stents | Baseline<br>1m (30 days)<br>3m<br>6m<br>1y<br>18m<br>2y | Angiography<br>**<br>**<br>**<br>**<br>**<br>**                         |                                                                                                                                                                                                                    |
| Kavan <i>et al.</i> 2016                    | Angioplasty    | Baseline<br>1m (30 days)<br>3m<br>6m<br>1y              | Angiography<br>Angiography<br>Angiography<br>Angiography<br>Angiography | Unclear as study was in Czech with limited English translation<br><br>Inferred that angiograms were done at 3/6/12m from subsequent English paper published                                                        |

|                          |                |                                                  |                                                                 |                                                                                                                                                                                                                                                  |
|--------------------------|----------------|--------------------------------------------------|-----------------------------------------------------------------|--------------------------------------------------------------------------------------------------------------------------------------------------------------------------------------------------------------------------------------------------|
|                          | Covered stents | Baseline<br>1m (30 days)<br>3m<br>6m<br>1y       | Angiography<br>Angiography<br>Angiography<br>Angiography        | Data at 12m overlapped with later study<br>(Kavan 2019)                                                                                                                                                                                          |
| Yang <i>et al.</i> 2018  | Angioplasty    | Baseline<br>1m (30 days)<br>3m<br>6m<br>1y<br>2y | Angiography<br>Angiography<br>Angiography<br>Angiography<br>*** | Clinical follow-up day 7 then monthly<br>Minimum follow-up was 1.5 years<br>Angiogram at 3m and 6m***.<br>Kaplan-Meier curves were constructed from<br>these data                                                                                |
|                          | Covered stents | Baseline<br>1m (30 days)<br>3m<br>6m<br>1y<br>2y | Angiography<br>Angiography<br>Angiography<br>Angiography<br>*** |                                                                                                                                                                                                                                                  |
| Kavan <i>et al.</i> 2019 | Angioplasty    | Baseline<br>1m (30 days)<br>3m<br>6m<br>1y<br>2y | Angiography<br>Angiography<br>Angiography<br>Angiography<br>‡   | Clinical follow-up interval not stated<br>Mean duration 22.4 months<br>Angiography may be earlier if suspected<br>stenosis<br><br>After 1y, angiography if clinical indication‡.<br><br>Kaplan-Meier curves were constructed from<br>these data. |
|                          | Covered stents | Baseline<br>1m (30 days)<br>3m<br>6m<br>1y<br>2y | Angiography<br>Angiography<br>Angiography<br>Angiography<br>‡   |                                                                                                                                                                                                                                                  |

|                     |                        |                                                                         |                                                             |                                                                                                                                               |
|---------------------|------------------------|-------------------------------------------------------------------------|-------------------------------------------------------------|-----------------------------------------------------------------------------------------------------------------------------------------------|
| AveNEW<br>(ongoing) | Angioplasty            | Baseline<br>1m (30 days)<br>3m (90 days)<br>6m<br>1y<br>18m<br>2y<br>3y | Angiography<br>‡‡<br>‡‡<br>‡‡<br>‡‡<br>‡‡<br>‡‡<br>‡‡<br>‡‡ | Clinical and telephone follow-up<br>Protocol did not state mandatory angiogram<br>follow-up <sup>‡‡</sup> .<br><br>3-year follow-up (ongoing) |
|                     | Covered stents (brand) | Baseline<br>1m (30 days)<br>3m (90 days)<br>6m<br>1y<br>18m<br>2y<br>3y | Angiography<br>‡‡<br>‡‡<br>‡‡<br>‡‡<br>‡‡<br>‡‡<br>‡‡<br>‡‡ |                                                                                                                                               |

**Supplementary table 4.** Summary of method used to measure patency at various time points in included studies.
